# Supplementary material for: Emergence of resistance-associated variants during sofosbuvir treatment in chronically infected hepatitis E patients
Source: PubMed Central journal article supplement — Hepatology. 2023 Jun 20;78(6):1882–95. doi: 10.1097/HEP.0000000000000514 (PMC10653298; doi:10.1097/hep.0000000000000514), 2023-06-20
Supplement: hep-78-1882-s001.pdf [file hep-78-1882-s001.pdf]

## Supplementary Information to

### **Emergence of resistance-associated variants during sofosbuvir treatment in chronically infected hepatitis E patients**

André Gömer<sup>1,\*</sup>, Mara Klöhn<sup>1,\*</sup>, Michelle Jagst<sup>1,2,\*</sup>, Maximilian Nocke<sup>1</sup>, Sven Pischke<sup>3,4</sup>, Thomas Horvatits<sup>3,4,5</sup>, Julian Schulze zur Wiesch<sup>3,4</sup>, Tobias Müller<sup>6</sup>, Svenja Hardtke<sup>7,8</sup>, Markus Cornberg<sup>7,9,10,11</sup>, Heiner Wedemeyer<sup>7,9,10</sup>, Patrick Behrendt<sup>9,10,12</sup>, Eike Steinmann<sup>1,13,\*†</sup>, Daniel Todt<sup>1,14,\*†</sup>

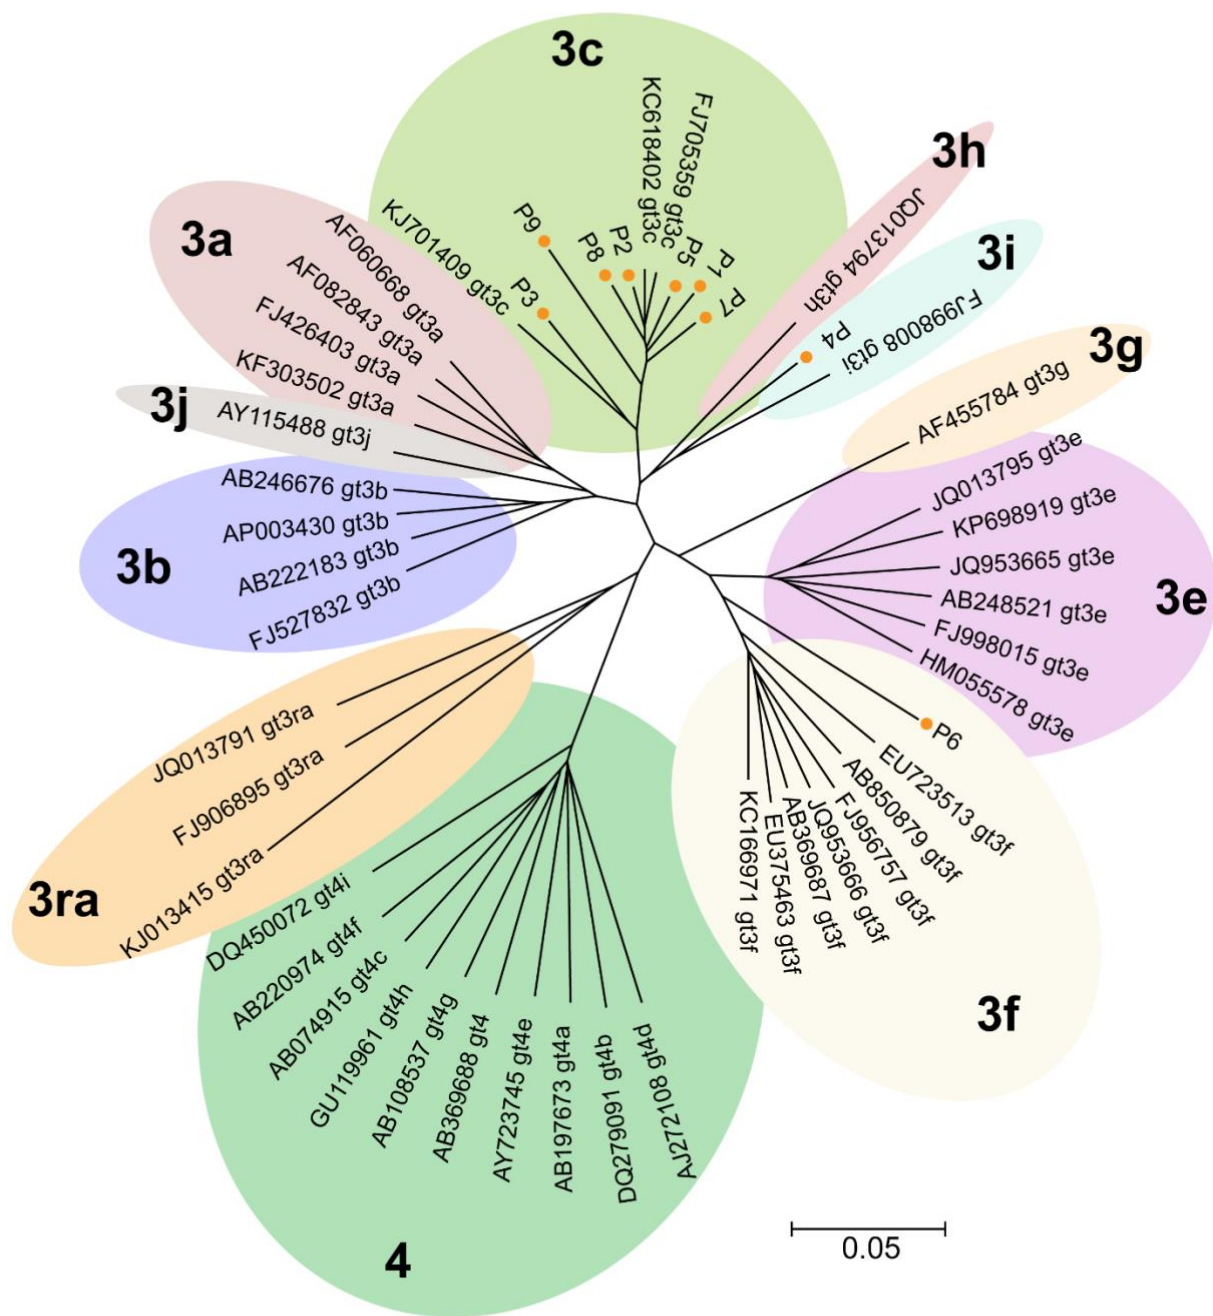

**Figure S1: Phylogenetic analysis of HEV genotypes in the patient cohort.**

Construction of a maximum-likelihood tree with haplotypes derived from the NGS data and NCBI deposited HEV sequences that depicts HEV subtypes.

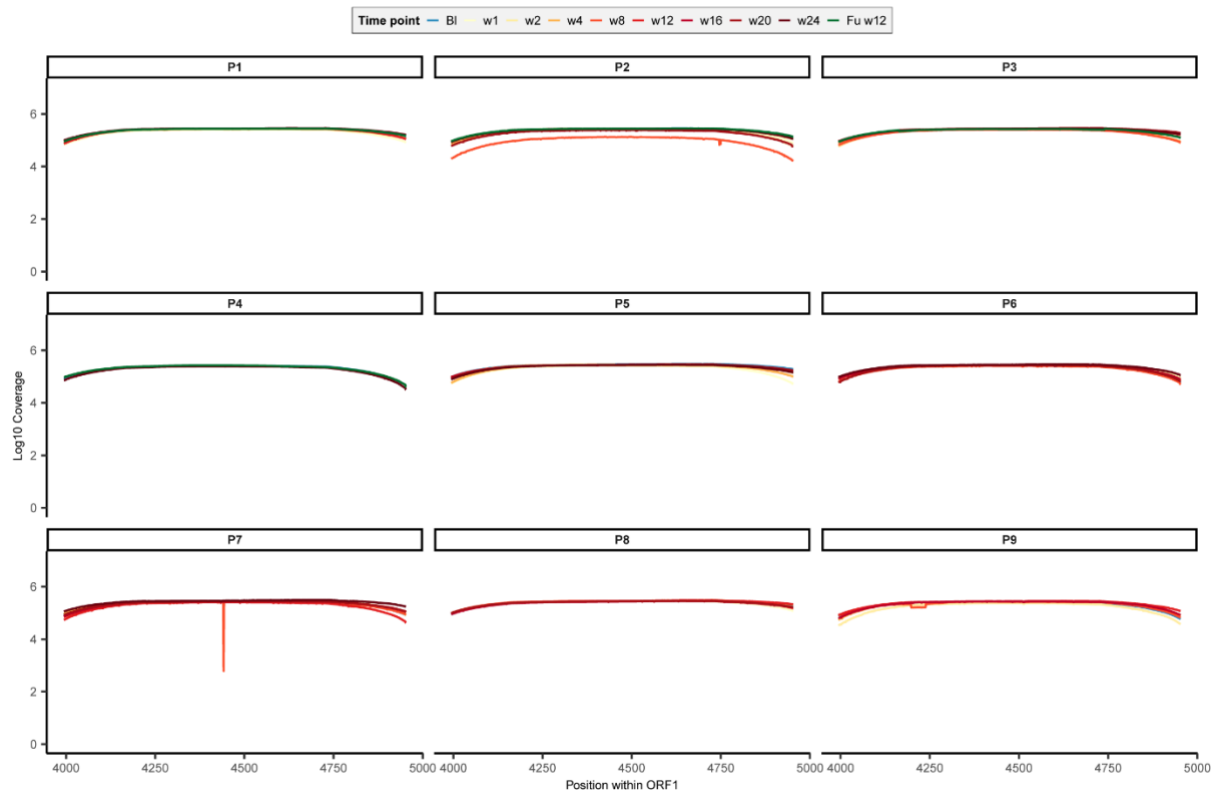

**Figure S2: Coverage statistics.**

Sequence coverage over the amplicon region for each patient (color coded) and each amplicon that was generated. Mean coverage 231,117 (sd: 56,587).

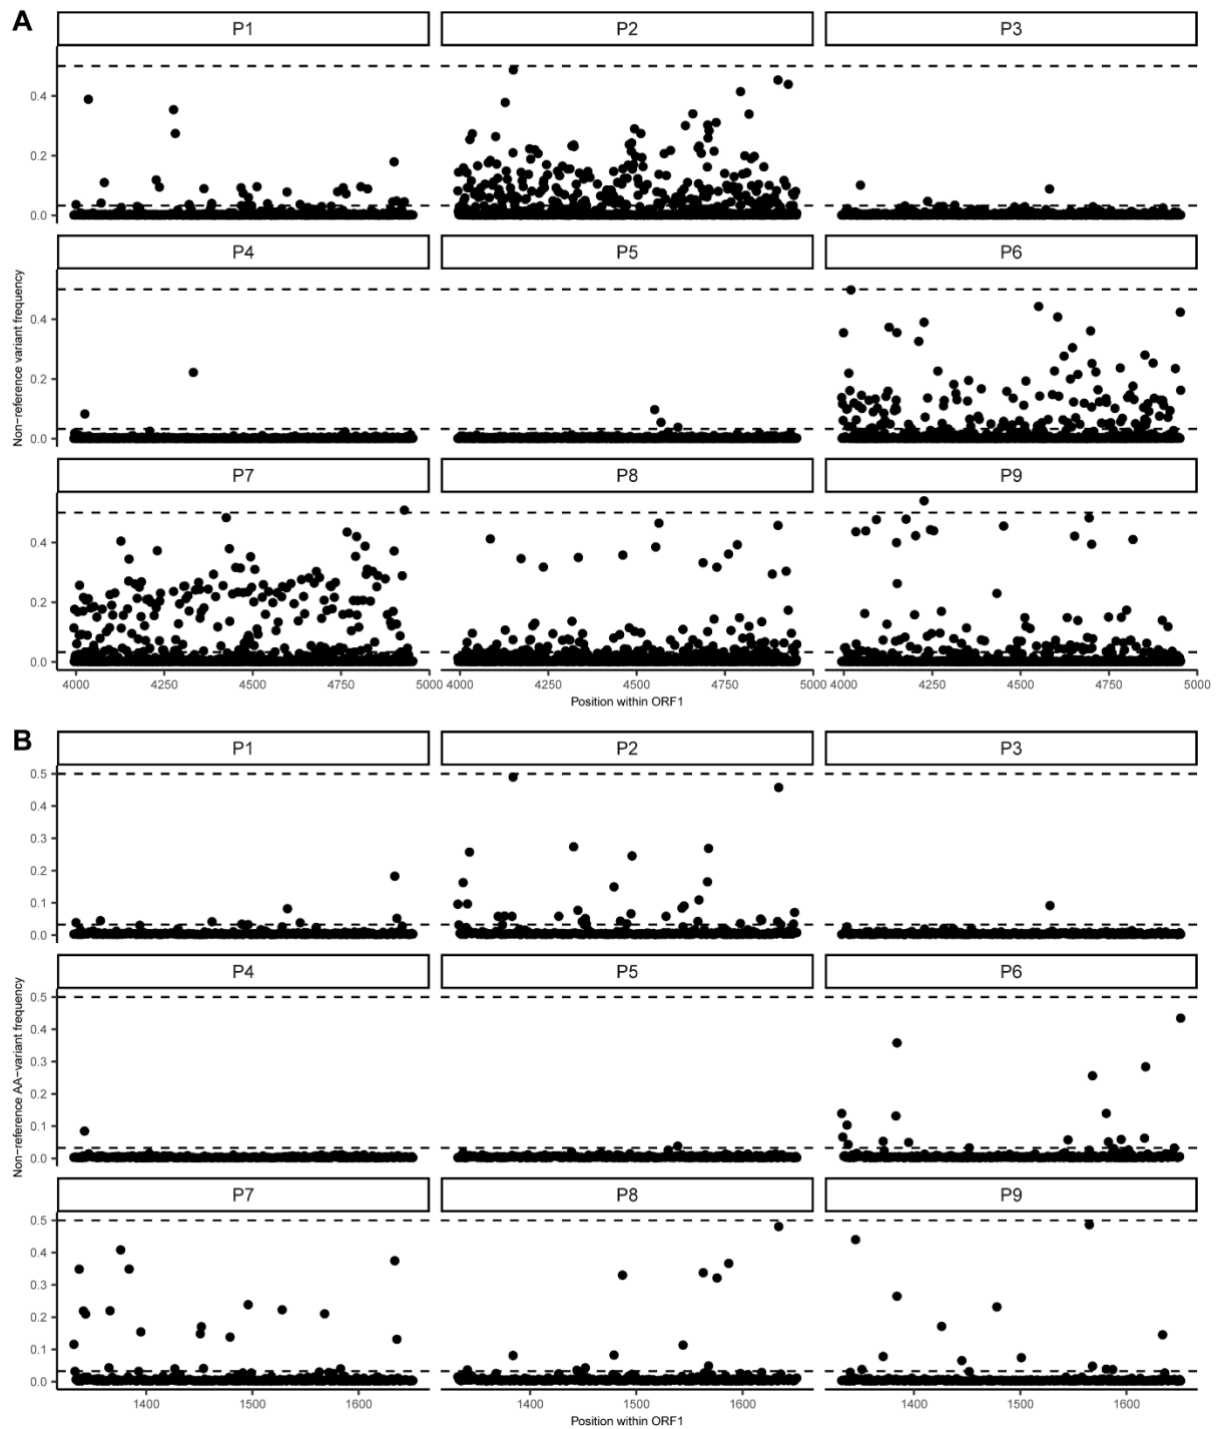

**Figure S3: Sequence diversity at baseline.**

A) Nucleotide diversity at baseline for each patient. All variant frequencies were below 50%, except in P7, position 936, and P9, position 234. For these positions, non-reference variant frequencies were at 50.8% and 53.9%, respectively. The major nucleotides present for P7 at position 936 were: A: 0.5%, C: 46%, T: 49%, G: 47%, and for P9 at position 234 were: A: 16%, C: 37.9%, T: 46%, G: 0.05%. B) At the amino acid level, all variants were below the consensus threshold.

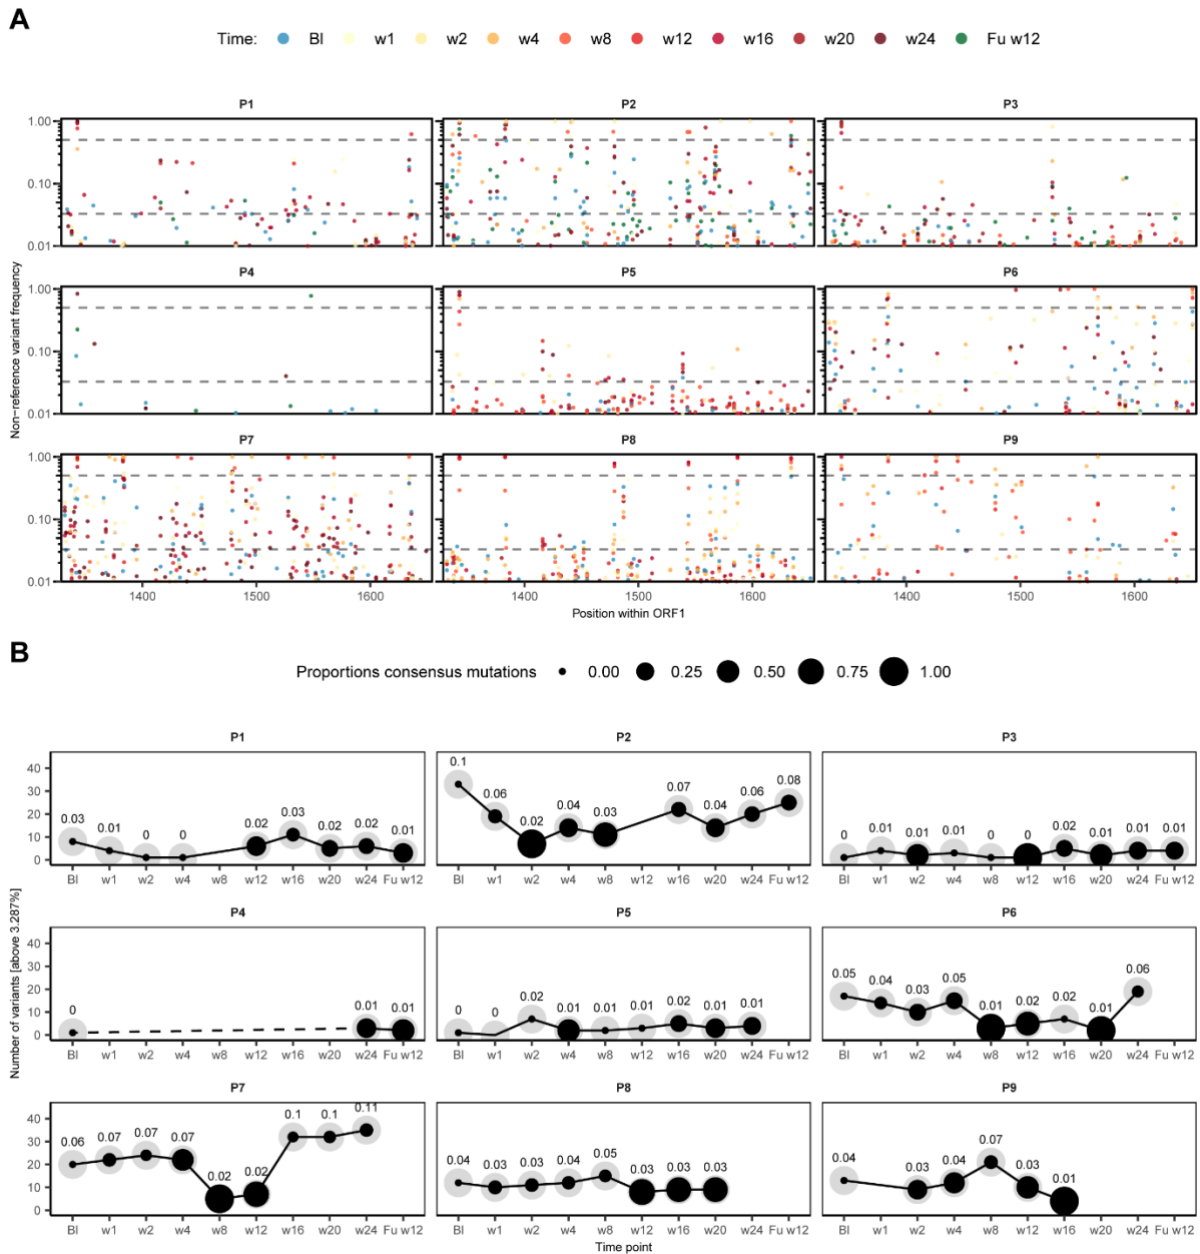

**Figure S4: Effects of sofosbuvir on viral amino acid sequence diversity.**

A) Frequency of non-reference variants within the RdRp of HEV ORF1 compared to the time of treatment initiation (baseline). The cutoff for biological relevance (lower dashed line) was set at 3.287%, according to Illumina error rates. The top dashed line (50%) indicates consensus sequence mutations. Each dot represents a variant at a given time point which is color coded, see Legend. B) Quantification of variants for each patient and time point that occur above the error cutoff. The size ratio of the dot indicates the percentage of consensus sequence changes compared to the total number of mutations. Labels indicate size normalized variation.

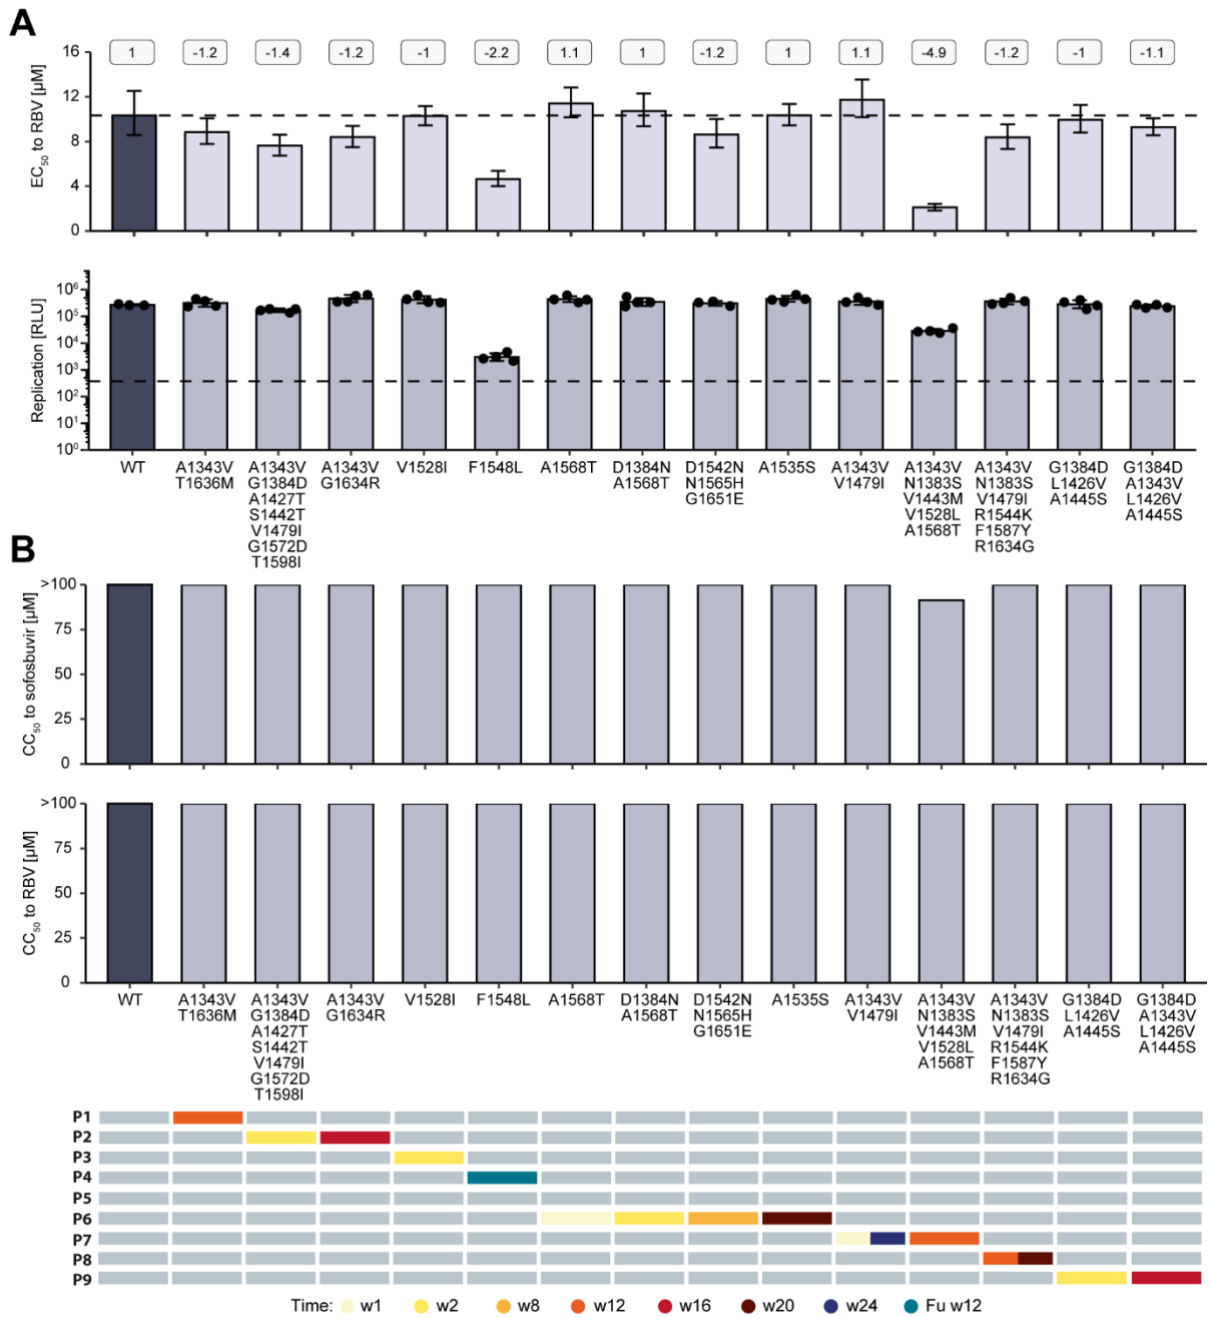

**Figure S5: Impact of patient-derived on sofosbuvir and ribavirin sensitivity and replication.**

A) Variant sensitivity (EC<sub>50</sub>) and replication capacity (relative light units) of HepG2 cells harboring patient-derived under ribavirin treatment. Dashed lines represent wild-type control (top panel) and replication-deficient control (GAA, bottom panel). Boxes above graph depict fold changes compared to WT. Top panel error bars = 95 % confidence interval, bottom panel error bars = ± SD. B) Cell viability was determined for patient-derived variants by MTT assay and plotted as half-maximum cytotoxic concentration (CC<sub>50</sub>) as determined by the four-parameter logistic model. n ≥ 3.

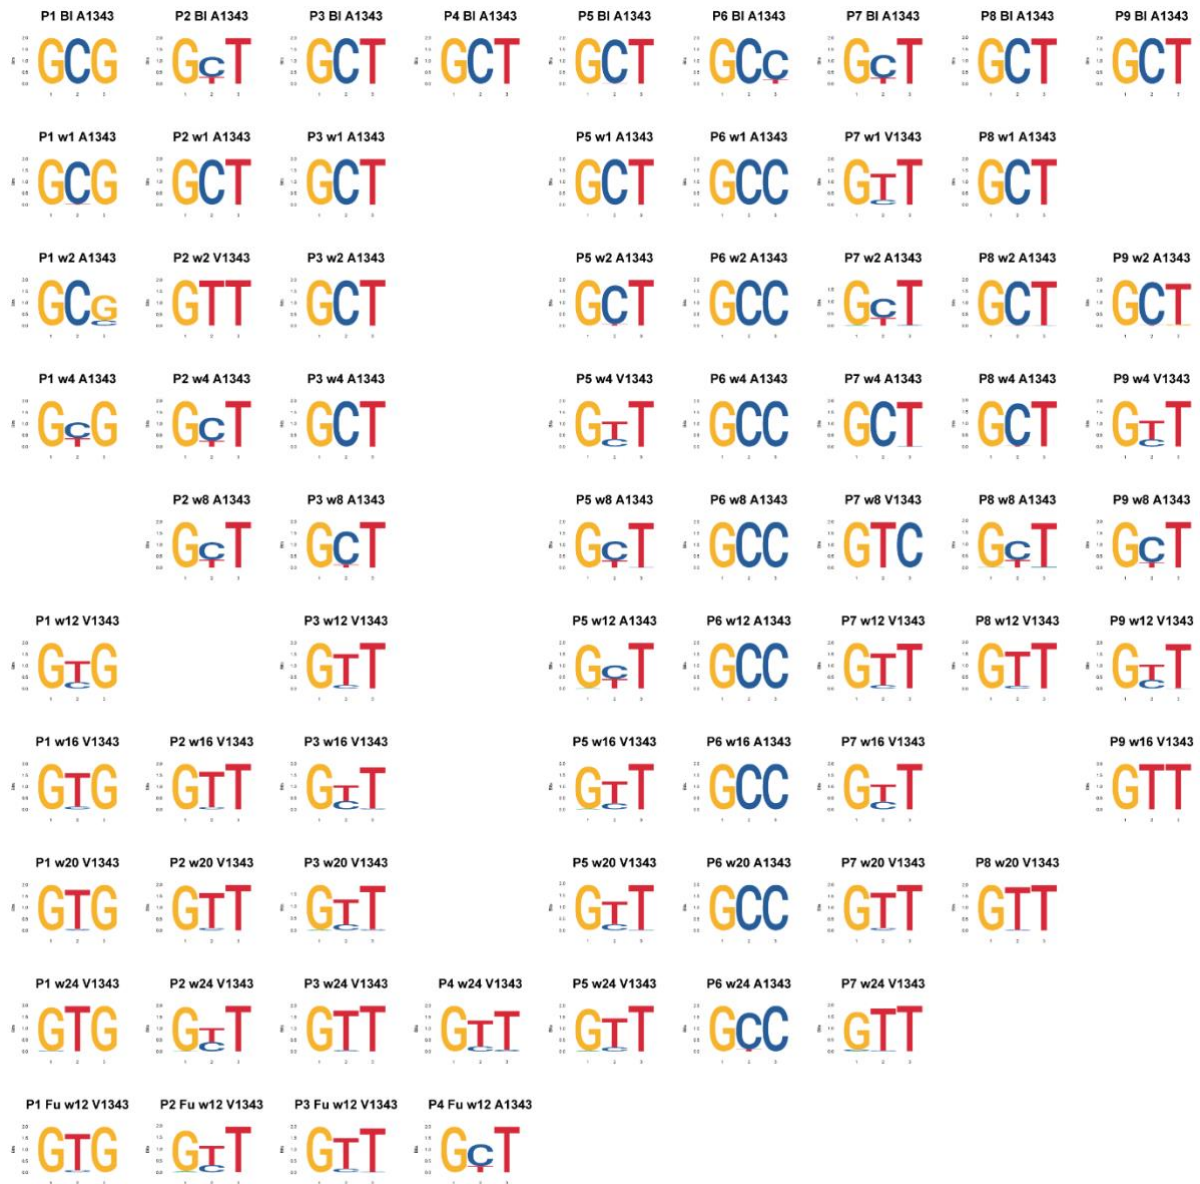

**Figure S6: Codon frequency evolution of A1343V.**

Frequency of the codon encoding the amino acid at position 1343. GCT, GCC, and GCG encode for alanine, while a transition (C->T) at the second codon position translates for valine (GTN). Letter height in bits indicates the frequency of each nucleotide at the respective codon position.

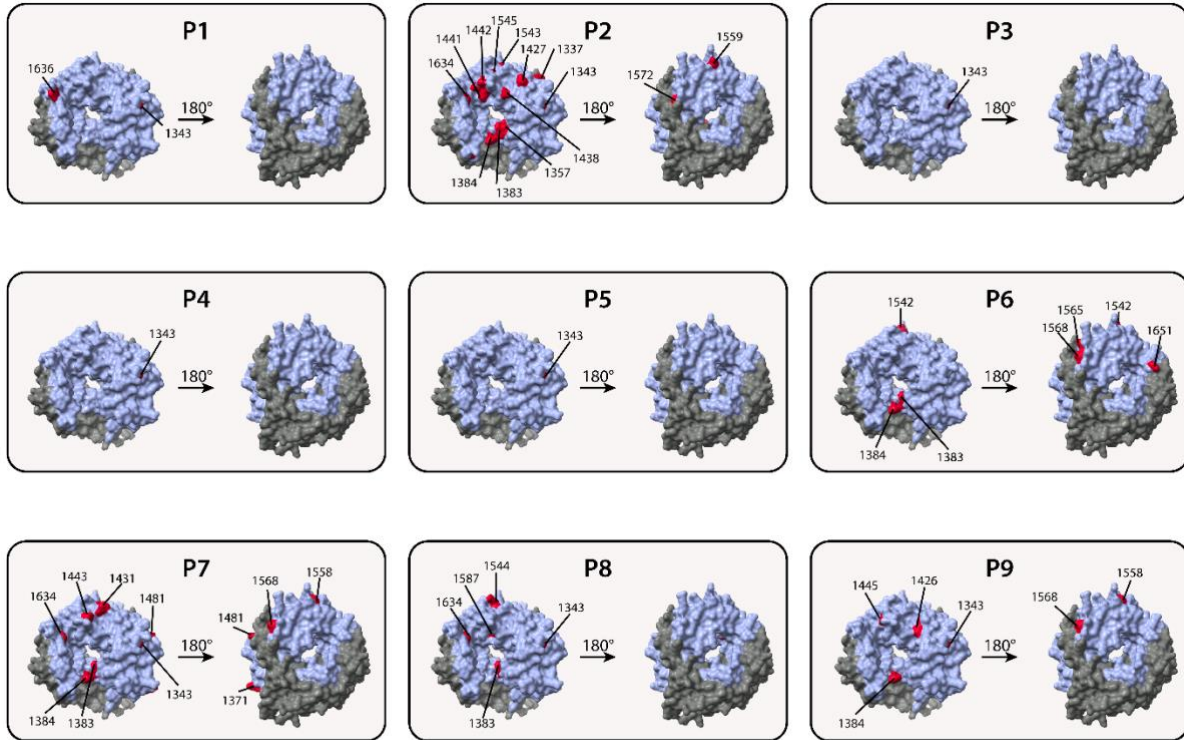

**Figure S7: Localization of patient-derived consensus substitution on the RdRp structure model.**

P6-based alpha-fold model of HEV RdRp. Models are shown from two sides (rotated 180° at y plane). Blue shows all residues that were included in the amplicon and grey highlights those that were not included. Residues that had consensus sequence changes were highlighted in red.



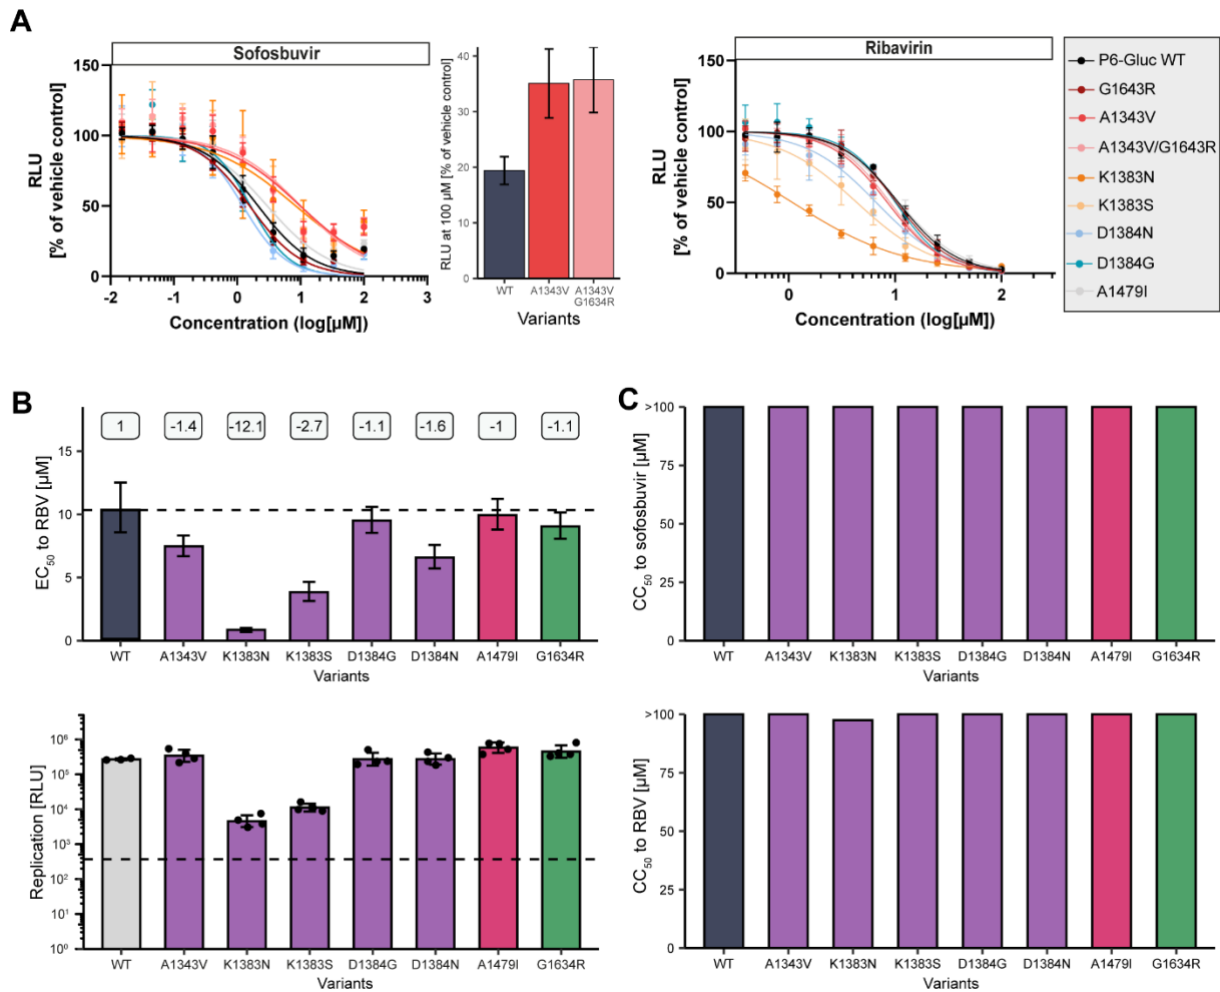

**Figure S8: Impact of single amino acid variants on sofosbuvir and ribavirin sensitivity and replication.**

(A) Dose-response curves of single amino acid (G1634R, A1343V, K1383N, K1383S, D1384N, D1384S) variants, p6-Gluc WT and the A1343V/G1634R variant were plotted and adjusted in GraphPad Prism to the non-linear fit regression model (left and right panel). Percent of relative light units at maximum sofosbuvir concentration (100  $\mu$ M) (middle panel). B) Sensitivity (EC<sub>50</sub>) and replication capacity (relative light units) of variants in HepG2 cells under ribavirin treatment. Dashed lines represent wild-type control (B, top panel) and replication-deficient control (GAA, bottom panel). Boxes above graph depict fold changes compared to WT. Top panel error bars = 95 % confidence interval, bottom panel error bars =  $\pm$  SD. C) Cell viability was determined for single amino acid variants by MTT assay and plotted as half-maximum cytotoxic concentration (CC<sub>50</sub>) as determined by the four-parameter logistic model. n  $\geq$  3.

**Table S1: Dose-response parameters for sofosbuvir treatment.** EC<sub>50</sub>, EC<sub>10</sub>, EC<sub>90</sub> and CC<sub>50</sub> values with confidence intervals (CI). Significance of EC<sub>50</sub> and replication data indicated by p values. F = degree of freedom, DRC = dose-response curves.

|            |               | EC50  |                 | EC10    |                   | EC90  |                | CC50  | test against wt |               | replication [RLU] |          | DRC curves                                                                            |
|------------|---------------|-------|-----------------|---------|-------------------|-------|----------------|-------|-----------------|---------------|-------------------|----------|---------------------------------------------------------------------------------------|
|            |               | value | CI              | value   | CI                | value | CI             | value | p-value         | F (DFn, DFd)  | fold-change to WT | p-values |                                                                                       |
| sofosbuvir | P6-Gluc WT    | 2.138 | 1.667 to 2.775  | 0.239   | 0.1429 to 0.4072  | 19.13 | 11.22 to 32.01 | >100  | NA              | NA            | 1.0               | NA       | 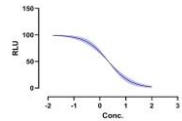   |
|            | G1634R        | 1.575 | 1.286 to 1.939  | 0.1993  | 0.1305 to 0.3088  | 12.44 | 8.026 to 19.00 | >100  | 0.0055          | 8.784 (1, 34) | 1.6               | 0.6264   |    |
|            | A1343V        | 9.913 | 6.474 to 15.84  | 0.481   | 0.2019 to 1.159   | 204.3 | NA             | >100  | <0.0001         | 61.37 (1, 34) | 1.5               | 0.8024   |    |
|            | A1343V/G1634R | 10.03 | 6.051 to 17.59  | 0.6298  | 0.2408 to 1.676   | 159.6 | NA             | >100  | <0.0001         | 46.23 (1, 34) | 1.8               | 0.1337   |    |
|            | K1383N        | 3.525 | 2.123 to 6.135  | 0.08513 | 0.02898 to 0.2549 | 146   | NA             | >100  | 0.0532          | 4.120 (1, 25) | -25.3             | <0,0001  |    |
|            | D1384N        | 1.235 | 0.9867 to 1.551 | 0.2237  | 0.1414 to 0.3604  | 6.816 | 4.231 to 10.78 | >100  | <0.0001         | 22.66 (1, 34) | 1.4               | 0.9367   |   |
|            | K1383S        | 3.783 | 2.261 to 6.706  | 0.1253  | 0.04305 to 0.3739 | 114.2 | NA             | >100  | 0.0306          | 5.256 (1, 25) | -14.6             | <0,0001  |  |
|            | D1384G        | 1.625 | 1.201 to 2.247  | 0.3388  | 0.1894 to 0.6220  | 7.791 | 4.233 to 13.96 | >100  | 0.0924          | 2.998 (1, 34) | 1.1               | 0.9999   |  |

|                           |       |                |        |                   |       |                |      |         |               |       |         |                                                                                       |
|---------------------------|-------|----------------|--------|-------------------|-------|----------------|------|---------|---------------|-------|---------|---------------------------------------------------------------------------------------|
| A1479I                    | 2.978 | 2.092 to 4.348 | 0.2452 | 0.1200 to 0.5145  | 36.17 | 17.16 to 74.12 | >100 | 0.0653  | 3.627 (1, 34) | 2.6   | 0.0468  | 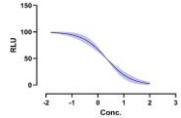   |
| T1636M (p1_w12)           | 10.48 | 6.680 to 17.26 | 0.4127 | 0.1639 to 1.045   | 266.1 | NA             | >100 | <0.0001 | 59.57 (1, 34) | 1.6   | 0.3689  |    |
| V1528I (p3_w2)            | 3.835 | 2.770 to 5.478 | 0.4259 | 0.2248 to 0.8272  | 34.54 | 17.73 to 65.55 | >100 | 0.0006  | 14.13 (1, 34) | 1.5   | 0.4634  |    |
| F1548L (p4_Fuw12)         | 12.58 | 7.866 to 21.12 | 0.671  | 0.2629 to 1.724   | 235.9 | NA             | >100 | <0.0001 | 68.73 (1, 34) | -48.9 | <0,0001 |    |
| A1568T (p6_w1)            | 2.865 | 2.185 to 3.814 | 0.2942 | 0.1695 to 0.5208  | 27.9  | 15.73 to 48.49 | >100 | 0.0347  | 4.841 (1, 34) | 2.0   | 0.0341  |    |
| A1568T/D1384N (p6_w2)     | 1.248 | 1.008 to 1.553 | 0.1556 | 0.09950 to 0.2471 | 10.01 | 6.301 to 15.65 | >100 | <0.0001 | 23.62 (1, 34) | 1.8   | 0.1064  |    |
| A1535S (p6_w20)           | 2.602 | 1.918 to 3.600 | 0.2695 | 0.1459 to 0.5099  | 25.11 | 13.26 to 46.45 | >100 | 0.2034  | 1.682 (1, 34) | 1.9   | 0.4368  |   |
| V1479I/ A1343V (p7_w1,24) | 11.78 | 7.523 to 19.50 | 0.301  | 0.1158 to 0.7766  | 460.9 | NA             | >100 | <0.0001 | 68.67 (1, 34) | 1.5   | 0.3689  |  |
| P2_w2                     | 16.24 | 11.31 to 24.05 | 0.6792 | 0.3166 to 1.452   | 388.3 | NA             | >100 | <0.0001 | 151.2 (1, 34) | -1.5  | 0.2731  |  |

|            |       |                 |        |                   |       |                |       |         |                 |      |         |                                                                                     |
|------------|-------|-----------------|--------|-------------------|-------|----------------|-------|---------|-----------------|------|---------|-------------------------------------------------------------------------------------|
| P6_w8      | 1.332 | 0.8516 to 2.094 | 0.0591 | 0.02331 to 0.1549 | 30.02 | 11.43 to 76.19 | >100  | 0.0412  | 4.504 (1, 34)   | 1.6  | 0.4009  | 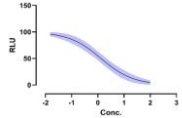 |
| P7_w12     | 25.93 | 16.60 to 43.78  | 0.5948 | 0.2288 to 1.488   | 1131  | NA             | 91.41 | <0.0001 | 161.4 (1, 34)   | -6.1 | <0,0001 |  |
| P8_w12, 20 | 12.42 | 8.420 to 19.07  | 0.2871 | 0.1235 to 0.6627  | 537.2 | NA             | >100  | <0.0001 | 96.14 (1, 34)   | 1.5  | 0.4346  |  |
| P9_w2      | 2.196 | 1.769 to 2.747  | 0.2516 | 0.1601 to 0.4012  | 19.18 | 12.02 to 30.14 | >100  | 0.8039  | 0.06261 (1, 34) | 1.5  | 0.3714  |  |
| P9_w16     | 9.392 | 6.577 to 13.77  | 0.4925 | 0.2366 to 1.037   | 179.1 | NA             | >100  | <0.0001 | 80.99 (1, 34)   | 1.1  | 0.9996  |  |

**Table S2: Dose-response parameters for ribavirin treatment.** EC<sub>50</sub>, EC<sub>10</sub>, EC<sub>90</sub> and CC<sub>50</sub> values with confidence intervals (CI). Significance of EC<sub>50</sub> and replication data indicated by p values. F = degree of freedom, DRC = dose-response curves.

|           |               | EC50   |                 | EC10    |                     | EC90  |                | CC50  | test against wt |               | replication [RLU] |          | DRC curves                                                                            |
|-----------|---------------|--------|-----------------|---------|---------------------|-------|----------------|-------|-----------------|---------------|-------------------|----------|---------------------------------------------------------------------------------------|
|           |               | value  | CI              | value   | CI                  | value | CI             | value | p-value         | F (DFn, DFd)  | fold-change to WT | p-values |                                                                                       |
| ribavirin | P6-Gluc WT    | 10.34  | 8.564 to 12.52  | 3.197   | 2.198 to 4.728      | 33.46 | 22.63 to 48.68 | >100  | NA              | NA            | 1.0               | NA       | 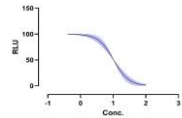   |
|           | G1634R        | 9.048  | 8.064 to 10.15  | 2.393   | 1.880 to 3.070      | 34.2  | 26.66 to 43.56 | >100  | 0.0233          | 5.645 (1, 34) | 1.8               | 0.2825   |    |
|           | A1343V        | 7.462  | 6.685 to 8.327  | 1.887   | 1.497 to 2.395      | 29.51 | 23.25 to 37.21 | >100  | <0.0001         | 36.43 (1, 34) | 1.3               | 0.9054   |    |
|           | A1343V/G1634R | 8.394  | 7.502 to 9.393  | 2.545   | 2.012 to 3.242      | 27.69 | 21.74 to 35.02 | >100  | 0.0006          | 14.25 (1, 34) | 1.8               | 0.0798   |    |
|           | K1383N        | 0.8556 | 0.7070 to 1.014 | 0.05092 | NA                  | 14.38 | 9.944 to 21.04 | 97.54 | <0.0001         | 863.1 (1, 34) | -56.0             | <0.0001  |    |
|           | D1384N        | 6.588  | 5.720 to 7.577  | 1.473   | 1.098 to 1.995      | 29.47 | 21.75 to 39.55 | >100  | <0.0001         | 42.86 (1, 34) | 1.1               | >0,9999  |   |
|           | K1383S        | 3.833  | 3.142 to 4.656  | 0.5599  | -infinity to 0.8626 | 26.24 | 17.13 to 39.72 | >100  | <0.0001         | 103.0 (1, 34) | -23.6             | <0.0001  |  |
|           | D1384G        | 9.502  | 8.533 to 10.59  | 2.935   | 2.345 to 3.698      | 30.76 | 24.41 to 38.49 | >100  | 0.1174          | 2.581 (1, 34) | 1.1               | >0,9999  |  |

|                           |       |                |        |                  |       |                |      |         |                    |       |         |                                                                                       |
|---------------------------|-------|----------------|--------|------------------|-------|----------------|------|---------|--------------------|-------|---------|---------------------------------------------------------------------------------------|
| A1479I                    | 9.93  | 8.782 to 11.22 | 2.267  | 1.748 to 2.961   | 43.5  | 33.27 to 56.44 | >100 | 0.4948  | 0.4764 (1, 34)     | 2.2   | 0.0464  | 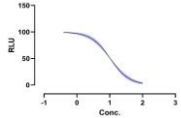   |
| T1636M (p1_w12)           | 8.843 | 7.784 to 10.07 | 2.997  | 2.313 to 3.921   | 26.1  | 19.95 to 33.81 | >100 | 0.0192  | 6.045 (1, 34)      | 1.2   | 0.9908  |    |
| V1528I (p3_w2)            | 10.27 | 9.440 to 11.17 | 3.031  | 2.537 to 3.638   | 34.77 | 28.97 to 41.55 | >100 | 0.8441  | 0.03926 (1, 34)    | 1.6   | 0.2259  |    |
| F1548L (p4_Fuw12)         | 4.632 | 3.998 to 5.371 | 0.5501 | 0.3970 to 0.7679 | 39    | 28.06 to 53.86 | >100 | <0.0001 | 115.5 (1, 25)      | -86.3 | <0,0001 |    |
| A1568T (p6_w1)            | 11.41 | 10.16 to 12.83 | 3.427  | 2.689 to 4.401   | 38.02 | 29.60 to 48.45 | >100 | 0.0965  | 2.922 (1, 34)      | 1.7   | 0.1522  |    |
| A1568T/D1384N (p6_w2)     | 10.72 | 9.358 to 12.30 | 3.944  | 2.998 to 5.245   | 29.11 | 21.91 to 38.26 | >100 | 0.6089  | 0.2666 (1, 34)     | 1.3   | 0.8415  |    |
| A1535S (p6_w20)           | 10.35 | 9.442 to 11.35 | 3.002  | 2.475 to 3.659   | 35.66 | 29.26 to 43.25 | >100 | 0.9922  | 9.636e-005 (1, 34) | 1.7   | 0.108   |   |
| V1479I/ A1343V (p7_w1,24) | 11.73 | 10.17 to 13.55 | 3.946  | 2.955 to 5.330   | 34.87 | 25.82 to 46.56 | >100 | 0.083   | 3.189 (1, 34)      | 1.3   | 0.7509  |  |
| P2_w2                     | 7.617 | 6.741 to 8.613 | 1.767  | 1.366 to 2.304   | 32.83 | 25.17 to 42.49 | >100 | <0.0001 | 25.17 (1, 34)      | -1.6  | 0.1754  |  |

|            |       |                |       |                |       |                |      |         |                |      |         |                                                                                     |
|------------|-------|----------------|-------|----------------|-------|----------------|------|---------|----------------|------|---------|-------------------------------------------------------------------------------------|
| P6_w8      | 8.632 | 7.457 to 9.998 | 1.66  | 1.219 to 2.280 | 44.89 | 32.63 to 61.19 | >100 | 0.017   | 6.297 (1, 34)  | 1.2  | 0.999   | 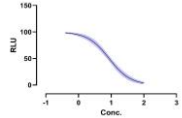 |
| P7_w12     | 2.097 | 1.814 to 2.413 | 0.118 | NA             | 37.26 | 26.79 to 51.89 | >100 | <0.0001 | 485.4 (1, 34)  | -9.4 | <0,0001 |  |
| P8_w12, 20 | 8.367 | 7.340 to 9.531 | 1.928 | 1.465 to 2.559 | 36.32 | 27.35 to 47.82 | >100 | 0.0022  | 11.00 (1, 34)  | 1.4  | 0.7059  |  |
| P9_w2      | 9.945 | 8.793 to 11.26 | 3.109 | 2.409 to 4.049 | 31.81 | 24.43 to 41.05 | >100 | 0.5148  | 0.4333 (1, 34) | 1.1  | 0.9997  |  |
| P9_w16     | 9.284 | 8.555 to 10.08 | 3.047 | 2.565 to 3.637 | 28.29 | 23.70 to 33.60 | >100 | 0.0112  | 7.204 (1, 34)  | -1.1 | 0.999   |  |
